# Supplementary material
Source: Research Square preprint supplement (doi:10.21203/rs.3.rs-9009395/v1)
Supplement: Supplementary file 1 [file 9b1f39a66ba791da7b6bef12.docx]

**INQUÉRITO ADOLESCENTES (11-17 ANOS)**

**O projeto CHANCE está a realizar um estudo sobre a saúde sexual e reprodutiva dos e das adolescentes e jovens. Em cada parte do questionário existem instruções sobre o seu preenchimento. Por favor, leia essas instruções com atenção. O questionário é anónimo e as respostas são absolutamente confidenciais. Estamos certos de que as suas respostas serão sinceras. Algumas das perguntas são sobre questões muito sensíveis relacionadas com a sua intimidade. Se não se sentir confortável em responder, não tem que o fazer. Se não compreender o que é questionado, não hesite em pôr a sua dúvida à pessoa que estiver a aplicar o questionário.**

**As informações fornecidas por você̂, através deste questionário, servirão à essa pesquisa sobre a saúde sexual e reprodutiva dos e das jovens e adolescentes. Todos os dados são confidenciais e serão utilizados apenas para este Projeto. Se não quiser participar não há problema. Se quiser desistir em algum momento também não há problema.**

**SECÇÃO 1: DADOS DEMOGRÁFICOS**

1. Qual é a sua idade? ________ anos – **(11 até 17 anos)**

2. Qual o seu nível de escolaridade?

Sem educação formal ( )

Ensino primário incompleto ( )

Ensino primário completo ( )

Primeiro ciclo incompleto ( )

Primeiro ciclo completo ( )

Segundo ciclo incompleto ( )

Segundo ciclo completo ( )

3. Qual é o seu sexo biológico?

( ) Homem

( ) Mulher

4. Religião:

- Católica Romana ( )

- Católica Ortodoxa ( )

- Evangélico ( )

- Evangélica Pentecostal ( )

- Igreja Evangélica Universal do Reino de Deus ( )

- Assembleia Evangélica de Deus ( )

- Metodista Evangélico ( )

- Evangélica Luterana ( )

- Batista Evangélico ( )

- Adventista ( )

- Testemunhas de Jeová ( )

- Mórmon / Jesus Cristo dos Santos dos Últimos Dias ( )

- Judeu ( )

- Islã/Muçulmano ( )

- Budista ( )

- Umbanda/Africanista ( )

- Espírita ( )

- Nenhum ( )

- Outra religião (especificar) ……………………………………………………..

5.Onde vive?

Área urbana ( )

Área periférica ( )

Área rural ( )

6. Em que bairro mora?

_____________________

7. Com quem mora?

- ( ) sozinha/o

- ( ) com os pais

- ( ) Morando com companheiro/a

- ( ) Com outros familiares

- ( ) pessoas que nao sao familiares

- ( ) Outro

8. Número de pessoas que vivem na sua casa:

Adultos:_________

Crianças com menos de 1 ano de idade:____

Crianças até aos 15 anos: ______

9. No lar quantas pessoas trabalham:

- ( ) Nenhuma

- ( ) Uma

- ( ) Duas

- ( ) Três ou mais

- ( ) Não sabe

10. Que tipo de trabalho fazem seus familiares:

- Pastor de gados proprietário ( )

- Pastor de gados – trabalhador ( )

- Fazendeiro – proprietário ( )

- Fazendeiro – trabalhador ( )

- Vendedor ambulante ( )

- Funcionario Público ( )

- Sector social ( )

- Sector privado ( )

- Trabalhos domésticos ( )

- Outro: ___________

11. Você trabalha?

( ) Não- **Ir para a pergunta 13**

( ) Sim

12. Em caso afirmativo, Que tipo de trabalho voce realiza?

- Trabalhos domesticos ( )

- Outro ( )

13. Tem electricidade em casa?

Não ( )

Sim ( )

14. Tem água corrente em casa?

Não ( )

Sim ( )

15. A casa tem rádio?

Não ( )

Sim ( )

16. A casa tem televisão?

Não ( )

Sim ( )

17. Tem alguma pessoa de referência para conversar sobre saúde sexual?

Sim ( )

Não ( ) - **ir para a secção 2**

18. Se sim, indique:

Conversa com a mãe ( )

Conversa com o pai ( )

Conversa com alguém da família ( )

Conversa com amigos/as ( )

Conversa com membro da igreja ( )

Conversa nas redes sociais ( )

Trabalhador/a de saúde ( )

Professores/as ( )

Colegas da escola ( )

**SECÇÃO 2: CONHECIMENTOS**

Responde as seguintes afirmações colocando um “x”.

|  | Verdadeiro | Falso | Não sei |
| --- | --- | --- | --- |
| 1. A relação sexual é o conjunto de comportamentos realizados por pelo menos duas pessoas com a finalidade de dar e receber prazer sexual. |  |  |  |
| 1. Gravidez é o período de tempo durante o qual uma mulher carrega um bebê em seu ventre. Por cerca de 11 meses, o bebê se desenvolve e cresce dentro do útero da mãe. |  |  |  |
| 1. Menstruação é quando o sangue sai do corpo de uma menina pela vagina. |  |  |  |
| 1. Menstruação é um sinal de que a menina está chegando ao fim da puberdade. |  |  |  |
| 1. A puberdade é quando seu corpo deixa de se parecer como de uma menina ou de um rapaz e passa a se parecer mais como de uma mulher adulta ou homem adulto. |  |  |  |
| 1. A ejaculação é a expulsão de um fluido biológico pelo pênis. |  |  |  |
| 1. As infecções sexualmente transmissíveis (ISTs) só afectam as mulheres. |  |  |  |
| 1. Qualquer tipo de relacção sexual desprotegida pode levar a infecções sexualmente transmissíveis. |  |  |  |
| 1. Existem movimentos que discriminem os casais homossexuais na sua comunidade. |  |  |  |
| 1. A privação dos direitos do movimento LGTBI+ é resultado dos factores culturais, tradicionais e religiosos. |  |  |  |
| 1. Estar perto de pessoas do movimento LGTBI+ ou ter acesso às informações sobre homossexualidade coloca em perigo o bem estar das crianças. |  |  |  |
| 1. As pessoas do movimento LGTBI+ estão expostas a violação dos direitos humanos. |  |  |  |

13. Quando se tem relacções sexuais durante o período menstrual há risco de ocorrer

uma gravidez:

Sim ( )

Não ( )

Não sei ( )

14. Quando se tem relacções sexuais pela primeira vez não se corre o risco de engravidar:

Sim ( )

Não ( )

Não sei ( )

15. Se utilizar métodos contraceptivos posso prejudicar a saúde:

Sim ( )

Não ( )

Não sei ( )

**SECÇÃO 3: ATITUDES /EXPERIÊNCIAS**

**Bloco 1. MENSTRUAÇÃO (homem e mulher respondem)**

1. O que você acha da menstruação?

- ( ) É algo bom e natural

- ( ) É algo mal.

2. Se uma menina ou mulher estiver menstruada, ela pode ir à escola ou trabalhar?

- ( ) Sim

- ( ) Não

1. És:

Homem ( ) – **ir para bloco 2 da secção 3**

Mulher ( )

4. Com que idade se iniciou a sua menstruação (sangue pela vagina)?

- ( ) Antes 10 anos de idade

- ( ) A partir 11 anos de idade

- ( ) Nunca menstruei – **ir para secção 4**

5. Você tem dores menstruais :

Sim ( )

Não ( )

6. Quais produtos você usa com mais frequência durante o período menstrual:

- ( ) Pensos de panos

- ( ) Absorventes internos

- ( ) Copo menstrual

- ( ) Cueca menstrual

- ( ) Absorvente externo

- ( ) Não uso

- ( ) Outro: ___________________

7. Por estar menstruada, você alguma vez deixou de:

- Ir à escola

- ( ) Sim

- ( ) Não

- Ir ao trabalho:

- ( ) Sim

- ( ) Não

- Sair de casa:

- ( ) Sim

- ( ) Não

- Fazer trabalhos domésticos:

( ) Sim

( ) Não

8. Tens possibilidade em comprar produtos menstruais todos os meses?

- ( ) Sim

- ( ) Não

9. Os produtos menstruais são de difícil acesso:

- ( ) Concordo fortemente

- ( ) Concordo

- ( ) Não discordo nem concordo

- ( ) Discordo

- ( ) Discordo fortemente

**Bloco 2. Relacções sexuais**

10. Você tem relacções sexuais?

Sim ( )

Não ( ) – **Ir para secção 5**

11. Se sim, com que idade você teve a primeira relacção sexual com penetração?

_____________________

12. Com quem teve a primeira relacção sexual:

- ( ) Amigo/a

- ( ) Namorado/a

- ( ) Pessoa desconhecida

- ( ) Familiar / Quem: _________________

13. Se sim, você sente prazer durante a relacção sexual?

Sim ( )

Não ( )

14. Qual é o número de pessoas com as quais manteve relacção sexual nos últimos 3

meses:

Nenhuma pessoa ( )

Uma pessoa ( )

Duas a cinco pessoas ( )

Seis a dez pessoas ( )

Mais de dez ( )

15. Quais da seguintes afirmações está próxima das suas práticas sexuais: Exclusivamente:

com pessoas do sexo oposto ( )

Com pessoas de ambos os sexos ( )

Exclusivamente com pessoas do mesmo sexo ( )

16. Nos últimos 12 meses, você teve relacções sexuais:

a. com uma pessoa diagnosticada com uma infecção sexualmente transmissível e/ou HIV-SIDA?

Sim ( )

Não ( )

Nao sei ( )

b. com duas ou mais pessoas ao mesmo tempo?

Sim ( )

Não ( )

c. sob a influência de alguma droga?

Sim ( )

Não ( )

d. sob a influência de álcool?

Sim ( )

Não ( )

e. por ameaça ou obrigação?

Sim ( )

Não ( )

f. em troca de receber dinheiro, drogas ou qualquer outro benefício?

Sim ( )

Não ( )

g. em troca de doar dinheiro, drogas ou qualquer outro benefício?

Sim ( )

Não ( )

**Para cada uma das seguintes afirmações, por favor diga-me se você concorda ou discorda.**

17. As escolas devem ensinar educação sexual aos jovens para os ajudar a tomar decisões:

Discorda fortemente ( )

Discorda ( )

Não concorda, nem discorda ( )

Concorda ( )

Concorda fortemente ( )

Não sabe ( )

**SECÇÃO 4: MÉTODOS CONTRACEPTIVOS:**

1. Você usa algum método para evitar uma gravidez?

Sim ( )

Não ( ) - **Ir para o secção 5**

2. Foi impedido de usar algum método contraceptivo por parte de alguém?

- ( ) Não – **ir para a pergunta 4**

- ( ) Sim

3. Por quem:

- Por parceiro/a ( )

- Profissional de saúde( )

- Família ( )

- Religião ( )

- Amigos/as ( )

4. Se sim, qual ou quais os métodos que você utiliza:

Método do calendário/tabela ( )

Coito interrompido ( )

Preservativo masculino ( )

Preservativo feminino ( )

Diafragma ( )

Espermicida ( )

Anticoncepção oral/pílula ( )

Anticoncepcional injectável hormonal ( )

Dispositivo intrauterino/DIU ( )

Laqueação ( )

Vasectomia ( )

5. Você faz uso da camisinha?

Sim ( )

Não ( ) – **ir para pergunta 7**

6. Se sim, com que frequência:

Uso em todas as relacções sexuais ( )

Só nas relações sexuais com pessoas que não conheço ( )

7. Se você fizer sexo com uma pessoa que acabou de conhecer, você sugeriria usar camisinha?

Sim ( )

Não ( )

8. Nos últimos 6 meses, você se lembra de ter feito sexo sem camisinha?

Sim ( )

Não ( )

9. A utilização de preservativo na minha próxima relação sexual depende de:

Mim ( )

O parceiro ( )

Os dois ( )

**11. Para cada uma das seguintes afirmações, por favor diga-me se você concorda ou**

**discorda.**

a. Os contraceptivos devem estar disponíveis para todos, independentemente do

estado civil:

Discorda fortemente ( )

Discorda ( )

Não concorda, nem discorda ( )

Concorda ( )

Concorda fortemente ( )

Não sabe ( )

b. Os contraceptivos devem estar disponíveis para todas as pessoas sexualmente

activas, independentemente da idade:

Discorda fortemente ( )

Discorda ( )

Não concorda, nem discorda ( )

Concorda ( )

Concorda fortemente ( )

Não sabe ( )

**SECÇÃO 5: LGTBI**

1. Você conhece o que é LGTBI?

Sim ( )

Não ( )

2. Existem pessoas gays, lésbicas ou bissexuais entre as pessoas com quem você convive?

Sim ( )

Não ( )

3. Você concorda que todos têm o direito de amar quem quiserem, independentemente de serem do mesmo sexo ou não?

Sim ( )

Não ( )

4. Você presenciou ou presencia actos discriminatórios com base na orientação sexual de alguém do seu convívio?

Sim ( )

Não ( )

**SECÇÃO 6: VIOLÊNCIA**

1. Durante sua infância, alguma vez alguém te tocou de maneira inapropriada?

( ) Sim

( ) Não – **ir para pergunta 3**

2. se sim, por quem?

( ) uma pessoa da familia

( ) um conhecido fora da familia

( ) um desconhecido

3. Durante sua infância, alguma vez alguém te obrigou a realizar actos sexuais contra sua vontade?

( ) Sim

( ) Não – **ir para pergunta 5**

4. Se sim, por quem?

( ) uma pessoa da familia

( ) um conhecido fora da familia

( ) um desconhecido

5. Durante sua infância, você já ouviu testemunhos de actos sexuais inapropriados em sua casa?

( ) Sim

( ) Não

6. Durante sua infância, você já sentiu que alguém de sua família / amigo da família queria ter relações sexuais com você?

( ) Sim

( ) Não

7. Alguma vez alguém te tocou ou acariciou sexualmente sem você quiser?

( ) Sim

( ) Não

8. Alguma vez alguém tentou ou conseguiu penetrá-lo(a) sem você quiser?

( ) Sim

( ) Não

9. Alguma vez alguém forçou você a realizar actos sexuais utilizando força física?

( ) Sim

( ) Não

10. Alguma vez alguém forçou você a praticar actos sexuais quando estava sob os efeitos do álcool ou das drogas e não podia dar seu consentimento?

( ) Sim

( ) Não

11. Ja pensou em fazer uma denúncia às autoridades?

- ( ) Sim

- ( ) Não – **ir para a secção 7**

12. Há Quanto tempo?

( ) Há menos de um ano

( ) Frequente, ainda continua

( ) Há mais de dois anos

13. Por quem?

( ) Familia

( ) Educador, professor

( ) Amigo

( ) Membro da Igreja

( ) Desconhecido

**SECÇÃO 7: GRAVIDEZ E ABORTO**

1. Você (no caso das mulheres) ou sua parceira (no caso dos homens), já alguma vez

engravidou sem o desejar?

Sim ( )

Não ( ) – **ir para a pergunta 4**

2. Você (no caso das mulheres) ou sua parceira (no caso dos homens), já alguma vez recorreu ao aborto para interromper uma gravidez não desejada?

Sim ( )

Não ( ) – **ir para a pergunta 4**

3. Sem sim, onde fez o aborto?

Hospital ( )

Posto de Saúde ( )

Casa ( )

4. Se for em casa, como fez?

- Medicamentos convencionais ( )

- Medicamentos tradicionais ( )

- Outros ( ): __________________

5. Uma mulher que opta por interromper uma gravidez deve ser enviada para a prisão?

Discorda ( )

Não concorda, nem discorda ( )

Concorda ( )

Concorda fortemente ( )

Não sabe ( )

6. Para cada uma das seguintes situações, diga-me se você acha que pode ser sempre justificável, às vezes justificável ou nunca justificável que uma mulher interrompa uma gravidez ou faça aborto se:

a. A gravidez resulta de uma violação ou foi engravidada por um familiar próximo, como o pai ou o irmão:

Nunca justificável ( )

Algumas vezes justificável ( )

Sempre justificável ( )

Não sabe. ( )

b. A sua saúde ou vida correm perigo se mantiver a gravidez?

Nunca justificável ( )

Algumas vezes justificável ( )

Sempre justificável ( )

Não sabe. ( )

c. Está a passar por dificuldades económicas e não pode tomar conta de uma criança :

Nunca justificável ( )

Algumas vezes justificável ( )

Sempre justificável ( )

Não sabe. ( )

d. Ela não quer manter a gravidez por qualquer motivo:

Nunca justificável ( )

Algumas vezes justificável ( )

Sempre justificável ( )

Não sabe. ( )

7. Na sua opinião, com que frequência as mulheres ou as meninas da sua comunidade interrompem a gravidez?

Frequentemente ( )

Algumas vezes ( )

Raramente Nunca ( )

Não sabe ( )

**SECÇÃO 8: IGUALDADE DE GÉNERO**

1. Na sua comunidade, com que frequência ocorrem as seguintes situações:

a. As meninas são impedidas de frequentar a escola porque as suas famílias dão prioridade a educação dos meninos:

Nunca ( )

Raramente ( )

Frequentemente ( )

Sempre ( )

Não sabe ( )

b. As meninas que estudam são discriminadas, criticadas e assediadas sexualmente pelos seus professores:

Nunca ( )

Raramente ( )

Frequentemente ( )

Sempre ( )

Não sabe ( )

c. As mulheres são sexualmente abusadas ou assediadas nos lugares públicos como nas praças, nas ruas ou nos transportes públicos:

Nunca ( )

Raramente ( )

Frequentemente ( )

Sempre ( )

Não sabe ( )

d. As mulheres são proibidas de trabalhar ou ter um emprego pelos seus maridos ou familiares:

Nunca ( )

Raramente ( )

Frequentemente ( )

Sempre ( )

Não sabe ( )

2. As meninas devem ser autorizadas a continuar a sua escolaridade mesmo que engravidem ou tenham filhos.

Discorda fortemente ( )

Discorda ( )

Não concorda, nem discorda ( )

Concorda ( )

Concorda fortemente ( )

Não sabe ( )

3. As meninas e as mulheres devem decidir por si próprias se e quando devem casar:

Discorda fortemente ( )

Discorda ( )

Não concorda, nem discorda ( )

Concorda ( )

Concorda fortemente ( )

Não sabe ( )

4. As mulheres devem decidir por si próprias quando e quantos filhos querem ter:

Discorda fortemente ( )

Discorda ( )

Não concorda, nem discorda ( )

Concorda ( )

Concorda fortemente ( )

Não sabe ( )

5. Você acha que as autoridades (policias, justiça) no nosso país, estão a fazer o suficiente para proteger as mulheres e as meninas da discriminação, do assédio ou abuso sexual nas escolas, nos locais de trabalho e nos lugares públicos, ou eles precisam melhorar a sua actuação?

Estão a fazer o suficiente ( )

Precisam melhorar um pouco mais ( )

Precisam melhorar muito mais ( )

Não sabe ( )

6. Na sua comunidade, caso uma mulher ou uma menina se queixar de estar a ser discriminada ou assediada/abusada sexualmente na escola, no local de trabalho ou nos espaços públicos, você acha ser provável que acreditem nela?

Nada provável ( )

Não muito provável ( )

Pouco provável ( )

Muito provável ( )

Não sabe ( )

# **ENGLISH VERSION**

# **ADOLESCENT SURVEY (11–17 YEARS)**

**The CHANCE project is conducting a study on the sexual and reproductive health of adolescents and young people. Each part of the questionnaire contains instructions on how to complete it. Please read these instructions carefully. The questionnaire is anonymous, and responses are absolutely confidential. We trust that your answers will be sincere. Some questions address very sensitive issues related to your privacy. If you do not feel comfortable answering, you do not have to do so. If you do not understand a question, do not hesitate to ask the person administering the questionnaire.**

**The information you provide through this questionnaire will support research on the sexual and reproductive health of young people and adolescents. All data are confidential and will be used only for this project. If you do not wish to participate, that is not a problem. If you decide to withdraw at any time, that is also not a problem.**

SECTION 1: DEMOGRAPHIC DATA

1. What is your age? ______ years (11 to 17 years)

2. What is your level of education?

- No formal education ( )

- Incomplete primary education ( )

- Completed primary education ( )

- Incomplete lower secondary ( )

- Completed lower secondary ( )

- Incomplete upper secondary ( )

- Completed upper secondary ( )

3. What is your biological sex?

( ) Male

( ) Female

4. Religion:

- Roman Catholic ( )

- Orthodox Catholic ( )

- Evangelical ( )

- Pentecostal Evangelical ( )

- Universal Church of the Kingdom of God ( )

- Evangelical Assembly of God ( )

- Methodist Evangelical ( )

- Lutheran Evangelical ( )

- Baptist Evangelical ( )

- Adventist ( )

- Jehovah’s Witness ( )

- Mormon / Church of Jesus Christ of Latter-day Saints ( )

- Jewish ( )

- Islam/Muslim ( )

- Buddhist ( )

- Umbanda/Africanist ( )

- Spiritist ( )

- None ( )

- Other religion (specify): __________________

5. Where do you live?

- Urban area ( )

- Peri-urban area ( )

- Rural area ( )

6. What neighborhood do you live in? __________________

7. Who do you live with?

- Alone ( )

- With parents ( )

- With a partner ( )

- With other relatives ( )

- With non-relatives ( )

- Other ( )

8. Number of people living in your household:

Adults: ______

Children under 1 year: ______

Children up to 15 years: ______

9. How many people in your household work?

- None ( )

- One ( )

- Two ( )

- Three or more ( )

- Don’t know ( )

10. What type of work do your family members do?

- Livestock owner ( )

- Livestock worker ( )

- Farmer – owner ( )

- Farmer – worker ( )

- Street vendor ( )

- Public employee ( )

- Social sector ( )

- Private sector ( )

- Domestic work ( )

- Other: __________

11. Do you work?

( ) No – Go to question 13

( ) Yes

12. If yes, what type of work do you do?

- Domestic work ( )

- Other ( )

13. Do you have electricity at home?

No ( )

Yes ( )

14. Do you have running water at home?

No ( )

Yes ( )

15. Does your home have a radio?

No ( )

Yes ( )

16. Does your home have a television?

No ( )

Yes ( )

17. Do you have someone you can talk to about sexual health?

Yes ( )

No ( ) – Go to Section 2

18. If yes, indicate:

Talk with mother ( )

Talk with father ( )

Talk with another family member ( )

Talk with friends ( )

Talk with a church member ( )

Talk on social media ( )

Health worker ( )

Teachers ( )

Schoolmates ( )

SECTION 2: KNOWLEDGE

Mark the following statements with an “X”: True / False / Don’t know

- Sexual intercourse is a set of behaviors carried out by at least two people for the purpose of giving and receiving sexual pleasure.

- Pregnancy is the period during which a woman carries a baby in her womb. For about 11 months, the baby develops and grows inside the mother’s uterus.

- Menstruation is when blood leaves a girl’s body through the vagina.

- Menstruation is a sign that a girl is reaching the end of puberty.

- Puberty is when your body stops looking like that of a girl or boy and begins to look more like that of an adult woman or man.

- Ejaculation is the expulsion of a biological fluid through the penis.

- Sexually transmitted infections (STIs) only affect women.

- Any type of unprotected sexual intercourse can lead to sexually transmitted infections.

- There are movements in your community that discriminate against homosexual couples.

- The deprivation of rights of the LGBTI+ movement is the result of cultural, traditional, and religious factors.

- Being close to people from the LGBTI+ movement or having access to information about homosexuality puts children’s well-being at risk.

- People in the LGBTI+ movement are exposed to human rights violations.

13. Having sexual intercourse during menstruation carries a risk of pregnancy:

Yes ( )

No ( )

Don’t know ( )

14. Having sexual intercourse for the first time does not carry a risk of pregnancy:

Yes ( )

No ( )

Don’t know ( )

15. Using contraceptive methods can harm my health:

Yes ( )

No ( )

Don’t know ( )

SECTION 3: ATTITUDES / EXPERIENCES

Block 1. MENSTRUATION (answered by males and females)

1. What do you think about menstruation?

- It is something good and natural ( )

- It is something bad ( )

2. If a girl or woman is menstruating, can she go to school or work?

Yes ( )

No ( )

You are:

Male ( ) – Go to Block 2

Female ( )

4. At what age did your menstruation begin (blood through the vagina)?

- Before age 10 ( )

- From age 11 ( )

- I have never menstruated – Go to Section 4

5. Do you have menstrual pain?

Yes ( )

No ( )

6. Which products do you use most often during your menstrual period?

- Cloth pads ( )

- Tampons ( )

- Menstrual cup ( )

- Menstrual underwear ( )

- External pads ( )

- I do not use any ( )

- Other: __________

7. Because you were menstruating, have you ever stopped:

Going to school? Yes ( ) No ( )

Going to work? Yes ( ) No ( )

Leaving the house? Yes ( ) No ( )

Doing household chores? Yes ( ) No ( )

8. Are you able to buy menstrual products every month?

Yes ( )

No ( )

9. Menstrual products are difficult to access:

Strongly agree ( )

Agree ( )

Neither agree nor disagree ( )

Disagree ( )

Strongly disagree ( )

Block 2. Sexual relations

10. Do you have sexual relations?

Yes ( )

No ( ) – Go to Section 5

11. If yes, at what age did you have your first sexual intercourse with penetration?

__________________

12. With whom did you have your first sexual intercourse?

Friend ( )

Boyfriend/Girlfriend ( )

Unknown person ( )

Family member / Who: __________

13. If yes, do you feel pleasure during sexual intercourse?

Yes ( )

No ( )

14. How many people have you had sexual intercourse with in the last 3 months?

None ( )

One ( )

Two to five ( )

Six to ten ( )

More than ten ( )

15. Which statement best describes your sexual practices? Exclusively:

With people of the opposite sex ( )

With people of both sexes ( )

Exclusively with people of the same sex ( )

16. In the past 12 months, have you had sexual intercourse:

- With someone diagnosed with an STI and/or HIV/AIDS? Yes ( ) No ( ) Don’t know ( )

- With two or more people at the same time? Yes ( ) No ( )

- Under the influence of drugs? Yes ( ) No ( )

- Under the influence of alcohol? Yes ( ) No ( )

- Due to threats or obligation? Yes ( ) No ( )

- In exchange for receiving money, drugs, or any other benefit? Yes ( ) No ( )

- In exchange for giving money, drugs, or any other benefit? Yes ( ) No ( )

17. Schools should teach sex education to help young people make decisions:

Strongly disagree ( )

Disagree ( )

Neither agree nor disagree ( )

Agree ( )

Strongly agree ( )

Don’t know ( )

SECTION 4: CONTRACEPTIVE METHODS

1. Do you use any method to prevent pregnancy?

Yes ( )

No ( ) – Go to Section 5

2. Has anyone prevented you from using a contraceptive method?

No ( ) – Go to question 4

Yes ( )

3. By whom?

Partner ( )

Health professional ( )

Family ( )

Religion ( )

Friends ( )

4. Which method(s) do you use?

Calendar method ( )

Withdrawal ( )

Male condom ( )

Female condom ( )

Diaphragm ( )

Spermicide ( )

Oral contraceptive/pill ( )

Hormonal injectable contraceptive ( )

Intrauterine device (IUD) ( )

Tubal ligation ( )

Vasectomy ( )

5. Do you use condoms?

Yes ( )

No ( ) – Go to question 7

6. If yes, how often?

In all sexual relations ( )

Only with people I do not know ( )

7. If you had sex with someone you just met, would you suggest using a condom?

Yes ( )

No ( )

8. In the last 6 months, do you remember having sex without a condom?

Yes ( )

No ( )

9. The use of a condom in my next sexual relation depends on:

Me ( )

My partner ( )

Both ( )

11. Contraceptives should be available to everyone regardless of marital status:

Strongly disagree ( )

Disagree ( )

Neither agree nor disagree ( )

Agree ( )

Strongly agree ( )

Don’t know ( )

Contraceptives should be available to all sexually active people regardless of age:

Strongly disagree ( )

Disagree ( )

Neither agree nor disagree ( )

Agree ( )

Strongly agree ( )

Don’t know ( )

SECTION 5: LGBTI

1. Do you know what LGBTI is?

Yes ( )

No ( )

2. Are there gay, lesbian, or bisexual people among those you live with?

Yes ( )

No ( )

3. Do you agree that everyone has the right to love whoever they want, regardless of whether they are the same sex or not?

Yes ( )

No ( )

4. Have you witnessed discriminatory acts based on someone’s sexual orientation?

Yes ( )

No ( )

SECTION 6: VIOLENCE

1. During your childhood, has anyone ever touched you inappropriately?

Yes ( )

No ( ) – Go to question 3

2. If yes, by whom?

Family member ( )

Someone known outside the family ( )

A stranger ( )

3. During your childhood, has anyone ever forced you to perform sexual acts against your will?

Yes ( )

No ( ) – Go to question 5

4. If yes, by whom?

Family member ( )

Someone known outside the family ( )

A stranger ( )

5. During your childhood, have you ever heard accounts of inappropriate sexual acts in your home?

Yes ( )

No ( )

6. During your childhood, have you ever felt that someone in your family or a family friend wanted to have sexual relations with you?

Yes ( )

No ( )

7. Has anyone ever touched or caressed you sexually without your consent?

Yes ( )

No ( )

8. Has anyone ever tried or succeeded in penetrating you without your consent?

Yes ( )

No ( )

9. Has anyone ever forced you to perform sexual acts using physical force?

Yes ( )

No ( )

10. Has anyone ever forced you to engage in sexual acts while you were under the influence of alcohol or drugs and unable to give consent?

Yes ( )

No ( )

11. Have you ever thought about reporting it to the authorities?

Yes ( )

No – Go to Section 7

12. How long ago?

Less than one year ( )

Ongoing/frequent ( )

More than two years ( )

13. By whom?

Family ( )

Educator/teacher ( )

Friend ( )

Church member ( )

Stranger ( )

SECTION 7: PREGNANCY AND ABORTION

1. Have you (for women) or your partner (for men) ever become pregnant unintentionally?

Yes ( )

No ( ) – Go to question 4

2. Have you or your partner ever resorted to abortion to terminate an unwanted pregnancy?

Yes ( )

No ( ) – Go to question 4

3. If yes, where was the abortion performed?

Hospital ( )

Health center ( )

Home ( )

4. If at home, how was it done?

Conventional medicines ( )

Traditional medicines ( )

Other: __________

5. A woman who chooses to terminate a pregnancy should be sent to prison:

Disagree ( )

Neither agree nor disagree ( )

Agree ( )

Strongly agree ( )

Don’t know ( )

6. In the following situations, do you think it is always justifiable, sometimes justifiable, or never justifiable for a woman to terminate a pregnancy?

- If the pregnancy results from rape or incest:

Never justifiable ( )

Sometimes justifiable ( )

Always justifiable ( )

Don’t know ( )

- If her health or life is in danger:

Never justifiable ( )

Sometimes justifiable ( )

Always justifiable ( )

Don’t know ( )

- If she is experiencing economic hardship and cannot care for a child:

Never justifiable ( )

Sometimes justifiable ( )

Always justifiable ( )

Don’t know ( )

- If she does not want to continue the pregnancy for any reason:

Never justifiable ( )

Sometimes justifiable ( )

Always justifiable ( )

Don’t know ( )

7. In your opinion, how often do women or girls in your community terminate a pregnancy?

Frequently ( )

Sometimes ( )

Rarely/Never ( )

Don’t know ( )

SECTION 8: GENDER EQUALITY

1. In your community, how often do the following occur?

- Girls are prevented from attending school because their families prioritize boys’ education:

Never ( )

Rarely ( )

Frequently ( )

Always ( )

Don’t know ( )

- Girls who study are discriminated against, criticized, or sexually harassed by their teachers:

Never ( )

Rarely ( )

Frequently ( )

Always ( )

Don’t know ( )

- Women are sexually abused or harassed in public places such as squares, streets, or public transport:

Never ( )

Rarely ( )

Frequently ( )

Always ( )

Don’t know ( )

- Women are forbidden to work or have a job by their husbands or relatives:

Never ( )

Rarely ( )

Frequently ( )

Always ( )

Don’t know ( )

2. Girls should be allowed to continue their education even if they become pregnant or have children.

Strongly disagree ( )

Disagree ( )

Neither agree nor disagree ( )

Agree ( )

Strongly agree ( )

Don’t know ( )

3. Girls and women should decide for themselves if and when they should marry.

Strongly disagree ( )

Disagree ( )

Neither agree nor disagree ( )

Agree ( )

Strongly agree ( )

Don’t know ( )

4. Women should decide for themselves when and how many children they want to have.

Strongly disagree ( )

Disagree ( )

Neither agree nor disagree ( )

Agree ( )

Strongly agree ( )

Don’t know ( )

5. Do you think the authorities (police, justice system) in our country are doing enough to protect women and girls from discrimination, harassment, or sexual abuse in schools, workplaces, and public places, or do they need to improve?

They are doing enough ( )

They need to improve a little ( )

They need to improve much more ( )

Don’t know ( )

6. In your community, if a woman or girl complains about being discriminated against or sexually harassed/abused at school, work, or in public spaces, how likely is it that people will believe her?

Not at all likely ( )

Not very likely ( )

Somewhat likely ( )

Very likely ( )

Don’t know ( )
